# Supplementary material for: Diversified Effects of COVID-19 as a Consequence of the Differential Metabolism of Phospholipids and Lipid Peroxidation Evaluated in the Plasma of Survivors and Deceased Patients upon Admission to the Hospital
Source: MDPI journal article supplement (doi:10.3390/ijms231911810), 2022-10-05
Supplement: s1 [file s1]

**Table S1.** Changes in examined parameters comparing the control to deceased COVID 19 patients and recovered COVID 19 patients group of plasma samples. One-way ANOVA analysis parameters; mean difference was significant at the 0.05 level ( $p < 0.0001$ \*\*\*\*;  $p < 0.001$ \*\*\*;  $p < 0.01$ \*\*;  $p < 0.05$ \*; n.s. – not significant).

|                    | Control |      |    | Covid 19 recovered |      |    | Covid 19 deceased |      |    | Control<br>vs. Covid 19<br>recovered | Control<br>vs. Covid 19<br>deceased | Covid 19<br>recovered<br>vs. Covid 19<br>deceased |
|--------------------|---------|------|----|--------------------|------|----|-------------------|------|----|--------------------------------------|-------------------------------------|---------------------------------------------------|
|                    | Mean    | SD   | n  | Mean               | SD   | n  | Mean              | SD   | n  |                                      |                                     |                                                   |
| PL-AA              | 209.8   | 36.4 | 33 | 103.9              | 19.3 | 66 | 174.5             | 38.6 | 22 | ****                                 | ****                                | ****                                              |
| PL-DHA             | 98.8    | 29.3 | 33 | 50.3               | 12.8 | 66 | 50.1              | 11.8 | 22 | ****                                 | ****                                | ns                                                |
| free AA            | 3.58    | 0.88 | 33 | 13.1               | 2.92 | 66 | 7.12              | 1.65 | 22 | ****                                 | ****                                | ****                                              |
| free DHA           | 2.75    | 0.54 | 33 | 4.11               | 1.03 | 66 | 3.96              | 0.67 | 22 | ****                                 | ****                                | ns                                                |
| PLA2               | 10.69   | 2.32 | 33 | 27.59              | 7.81 | 66 | 13.22             | 3.86 | 22 | ****                                 | ns                                  | ****                                              |
| LOX                | 0.18    | 0.03 | 33 | 0.38               | 0.08 | 66 | 0.35              | 0.07 | 22 | ****                                 | ****                                | ns                                                |
| COX-1              | 14.6    | 2.9  | 33 | 20.5               | 5.8  | 66 | 16.8              | 4.1  | 22 | ****                                 | ns                                  | **                                                |
| COX-2              | 10.6    | 2.1  | 33 | 21.15              | 6.7  | 66 | 9.7               | 3.1  | 22 | ****                                 | ns                                  | ****                                              |
| MDA                | 1.61    | 0.38 | 33 | 2.92               | 0.75 | 66 | 3.52              | 1.05 | 22 | ****                                 | ****                                | **                                                |
| 8-isoPGF2 $\alpha$ | 0.99    | 0.34 | 33 | 4.88               | 1.39 | 66 | 3.87              | 1.15 | 22 | ****                                 | ****                                | **                                                |
| PGE2               | 2.45    | 0.38 | 33 | 7.34               | 1.87 | 66 | 2.59              | 0.78 | 22 | ****                                 | ns                                  | ****                                              |
| TXB2               | 0.57    | 0.11 | 33 | 2.9                | 0.7  | 66 | 5.17              | 1.85 | 22 | ****                                 | ****                                | ****                                              |
| 12-HETE            | 22.78   | 8.94 | 33 | 99.66              | 31.2 | 66 | 34.33             | 8.98 | 22 | ****                                 | ns                                  | ****                                              |
| 15-d-PGJ2          | 10.09   | 2.46 | 33 | 18.34              | 4.76 | 66 | 11.17             | 3.08 | 22 | ****                                 | ns                                  | ****                                              |
| 2-AG               | 4.04    | 0.77 | 33 | 11.25              | 2.56 | 66 | 7.05              | 1.43 | 22 | ****                                 | ****                                | ****                                              |
| AEA                | 2.34    | 0.52 | 33 | 5.59               | 1.25 | 66 | 5.57              | 1.54 | 22 | ****                                 | ****                                | ns                                                |
| PEA                | 25.98   | 5.3  | 33 | 37.67              | 7.8  | 66 | 41.53             | 9.2  | 22 | ***                                  | ****                                | ns                                                |
| OEA                | 11.02   | 2.32 | 33 | 15.63              | 4.22 | 66 | 18.52             | 4.56 | 22 | ****                                 | ****                                | **                                                |
| TNF $\alpha$       | 7.1     | 1.05 | 33 | 11.13              | 2.64 | 66 | 8.94              | 1.27 | 22 | ****                                 | **                                  | ***                                               |
| IL-10              | 0.64    | 0.13 | 33 | 1.01               | 0.17 | 66 | 0.76              | 0.1  | 22 | ****                                 | *                                   | ****                                              |

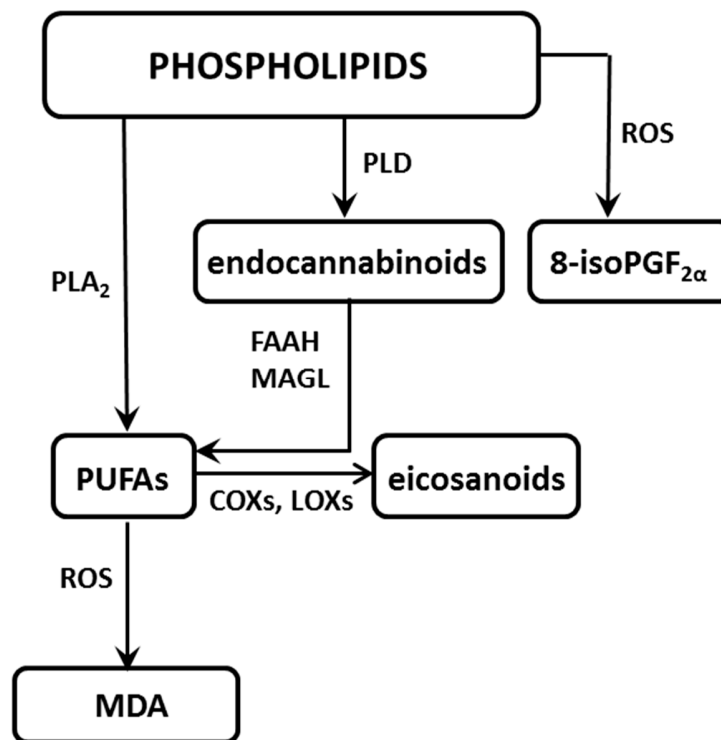

**Figure S1.** Phospholipid metabolism in response to reactions with reactive oxygen species (ROS) and enzymes (cyclooxygenases-(COXs) and lipoxygenases-(LOXs)).

FAAH - fatty acid amide hydrolase, MAGL - monoacylglycerol lipase, MDA - malondialdehyde, PLA<sub>2</sub> – phospholipase A<sub>2</sub>, PLD - phospholipase D, PUFAs – polyunsaturated fatty acids.
